# Supplementary material for: Examining the Transcriptomic and Biochemical Signatures of Bacillus subtilis Strains: Impacts on Plant Growth and Abiotic Stress Tolerance
Source: MDPI journal article supplement (doi:10.3390/ijms241813720), 2023-09-06
Supplement: s1 [file s1]

Supplemental Table 1. Primer sequences used for PCR and qPCR analysis

| For PCR analysis  |                                 |           |
|-------------------|---------------------------------|-----------|
| Primer            | Sequence                        | Locus     |
| fD1               | 5'-AGAGTTTGATCCTGGCTCAG-3'      | AB257199  |
| rP1               | 5'-ACGGTTACCTTGTTACGACTT-3'     | AB257199  |
| DhbF              | F: 5'-GAGGATTGGTACAACCGCCA-3'   | AEW31033  |
|                   | R: 5'-GCTAACCCCGCTCCTGATAC-3'   | AEW31033  |
| DhbB              | F: 5'-TCAGCCGTATCAAATGCCGA-3'   | AAC44633  |
|                   | R: 5'-AGGACCGCTGTTTAATCCCG-3'   | AAC44633  |
| DhbE              | F: 5'-GCCTCTTGCGATGGTATGGA-3'   | AAC44632  |
|                   | R: 5'-CTCTGCCATTCCGAACACCT-3'   | AAC44632  |
| sfp               | F: 5'-ATGAAGATTTACGGAATTTA-3'   | EU882341  |
|                   | R: 5'-TTATAAAAGCTCTTCGTACG-3'   | EU882341  |
| For qPCR analysis |                                 |           |
| Primer            | Sequence                        | Locus     |
| ACT2              | F: 5'-CGGTAACATTGTGCTCAGTG-3'   | AT3G18780 |
|                   | R: 5'-GTGAACGATTCTTGGACCTG-3'   | AT3G18780 |
| ICS1              | F: 5'-GGCTGCTCTGCATCCAACTC-3'   | AT1G74710 |
|                   | R: 5'-CGCCTGTAGAGATGTTGTTG-3'   | AT1G74710 |
| EDS1              | F: 5'-GAATTCGGGATCCGAGTGCG-3'   | AT3G48090 |
|                   | R: 5'-CCATCATATAGTCTCGCAGAG-3'  | AT3G48090 |
| CBP60G            | F: 5'-GTGAACTCGATCAAGTACAC-3'   | AT5G26920 |
|                   | R: 5'-CTGGCAGTTGTGTGTCTCCG-3'   | AT5G26920 |
| LOX1              | F: 5'-CGGACAGTATCCAGTTGCTG-3'   | AT1G55020 |
|                   | R: 5'-GTTCTTGAGAGTGTCTGTCGT-3'  | AT1G55020 |
| OPR3              | F: 5'-GGAAGTATGCAAGCTG-3'       | AT2G06050 |
|                   | R: 5'-CAACAAGTGGATCTTGAGTG-3'   | AT2G06050 |
| MYC2              | F: 5'-GCGAGTGCTAGTGGAGGAGA-3'   | AT1G32640 |
|                   | R: 5'-GTTCTGAGCTGTTCTTGCGT-3'   | AT1G32640 |
| NCED3             | F: 5'-CGGTGGTTTACGACAAGAAC-3'   | AT3G14440 |
|                   | R: 5'-CCATCCCTGCTTCGAGGTTG-3'   | AT3G14440 |
| ABI5              | F: 5'-GGATTAGGACATGGACAAGT-3'   | AT2G36270 |
|                   | R: 5'-GTGACAACCTCGGGTTCCTC-3'   | AT2G36270 |
| SDR4              | F: 5'-GCTTCTAAGCACGCGCTTCT-3'   | AT3G29250 |
|                   | R: 5'-TCATGAGCTTAACGACGCTA-3'   | AT3G29250 |
| DREB2A            | F: 5'-ATGGCAGTTTATGATCAGAG-3'   | AT5G05410 |
|                   | R: 5'-GTTCTCCAGATCCAAGTAAC-3'   | AT5G05410 |
| ZAT12             | F: 5'-GAGACACAGGAACGAGAGTG-3'   | AT5G59820 |
|                   | R: 5'-CTGTTCTTCCAAGCTCCAAC-3'   | AT5G59820 |
| APX1              | F: 5'-GACCATTGAGAGATGTC-3'      | AT1G07890 |
|                   | R: 5'-AGCATCAGCAAACCCAAG-3'     | AT1G07890 |
| GPX7              | F: 5'-CCGGTTCAAAGCAGAGTTCC-3'   | AT4G31870 |
|                   | R: 5'-TTGTGGGAGGGTATCTCTCG-3'   | AT4G31870 |
| P5CS1             | F: 5'-GGACTTGGTGCAGAGGTGGG-3'   | AT2G39800 |
|                   | R: 5'-GCTTGGATGGGAATGTCCTG-3'   | AT2G39800 |
| CAB1              | F: 5'-GGAAGATTGGCTATGTTCTC-3'   | AT1G29930 |
|                   | R: 5'-CGGGAACAAAGTTGGTGGCG-3'   | AT1G29930 |
| FRK1              | F: 5'-CAGGCCAACCTGCTATTGCA-3'   | AT2G19190 |
|                   | R: 5'-GGAACCATCTCGGTGTCTAG-3'   | AT2G19190 |
| PR1               | F: 5'-GGCAACTGCAGACTCATA-3'     | AT2G14610 |
|                   | R: 5'-GTATGGCTTCTCGTTCACAT-3'   | AT2G14610 |
| PR2               | F: 5'-ATGTCTGAATCAAGGAGCTT-3'   | AT3G57260 |
|                   | R: 5'-GTGGTGGTGTGTCAGTGGCTAT-3' | AT3G57260 |
| THI2.1            | F: 5'-CTGCCCTTCCAACCAAGCTA-3'   | AT1G72260 |
|                   | R: 5'-TTGTTCCGACGCTCCATTCA-3'   | AT1G72260 |
| NIT2              | F: 5'-CGTTTACGACACTCCGATTG-3'   | AT3G44300 |
|                   | R: 5'-CTGGTCTCGAGTAATGTCCA-3'   | AT3G44300 |
| RBOHC             | F: 5'-CAAGCGTATAGCTATGGATC-3'   | AT5G51060 |
|                   | R: 5'-GTGGAAGGAGAATCTGGTGC-3'   | AT5G51060 |

Source of database:

Genes analyzed in PCR: <https://www.ncbi.nlm.nih.gov/>Genes analyzed in qPCR: <https://www.arabidopsis.org/>
